# Supplementary material for: Increased circulating levels of Factor H-Related Protein 4 are strongly associated with age-related macular degeneration
Source: PubMed Central journal article supplement (PMC7005798; doi:10.1038/s41467-020-14499-3), 2020-02-07
Supplement: 41467_2020_14499_MOESM3_ESM.pdf [file 41467_2020_14499_MOESM3_ESM.pdf]

## Description of Additional Supplementary Files

File Name: Supplementary Data 1

Description: Single-variant association analyses with AMD for the 8 AMD independently associated variants at the CFH locus from the IAMDGC study (Fritsche et al. 2016).

File Name: Supplementary Data 2

Description: Single-variant association analyses with FHR-4/FH levels for the 8 AMD independently associated variants at the CFH locus from the IAMDGC study (Fritsche et al. 2016).

File Name: Supplementary Data 3

Description: Association results for the variants showing a P-value  $\leq 10^{-6}$  in the GWAS meta-analysis of FHR-4 levels using controls only.

File Name: Supplementary Data 4

Description: Association results for the variants showing a P-value  $\leq 10^{-6}$  in the GWAS meta-analysis of FHR-4 levels using all samples, further adjusting for AMD status.

File Name: Supplementary Data 5

Description: Linkage disequilibrium measures ( $R^2$  and  $D'$ ) for the variants showing the top association signals in the GWAS meta-analysis of FHR-4 levels using all samples.

File Name: Supplementary Data 6

Description: Association results for the variants showing a P-value  $\leq 10^{-6}$  in the GWAS meta-analysis of FH levels using controls only.

File Name: Supplementary Data 7

Description: Association results for the variants showing a P-value  $\leq 10^{-6}$  in the GWAS meta-analysis of FH levels using all samples, further adjusting for AMD status.

File Name: Supplementary Data 8

Description: Linkage disequilibrium measures ( $R^2$  and  $D'$ ) for the variants showing the genome-wide association signals in the GWAS meta-analysis of FH levels using all samples.

File Name: Supplementary Data 9

Description: Association analyses of the common haplotypes (with overall frequency  $\geq 1\%$ ) formed by the 7 AMD independently associated variants at the CFH locus considered in our study and rs6677604 (proxy for the previously reported AMD protective CFHR1-3 deletion (Hughes et al. 2006)) with AMD, FHR-4 and FH levels.

File Name: Supplementary Data 10

Description: Association analyses of the common diplotypes (haplotype pairs, with overall frequency  $\geq 1\%$ ) formed by the 7 AMD independently associated variants at the CFH locus considered in our study and rs6677604 (proxy for the previously reported AMD protective CFHR1-3 deletion (Hughes et al. 2006)) with AMD, FHR-4 and FH levels.

File Name: Supplementary Data 11

Description: Association analyses of the haplotypes formed by rs10922109 (1.1) and rs61818925 (1.6) with AMD, FHR-4 and FH levels.
